# Supplementary material for: Pan-Arctic surface ozone: modelling vs measurements
Source: Copernicus journal article supplement (doi:10.5194/acp-2019-984), 2020-02-26
Supplement: Supplementary file [file acp-2019-984-AC1-supplement.pdf]

**We thank reviewer #1 thoughtful comments on our manuscript. Below are our responses to each of the question raised.**

*Question: A major lack of the manuscript comes from the belief that the process trying to be model is uniquely represented by the model. This belief underlies statements such as in the abstract, where the manuscript states "...reproducing both ODEs and BEEs in the Arctic indicates that the relevant parameterizations implemented in the models work reasonably well, which supports the proposed mechanism of SSA and bromine production from blowing snow on sea ice." It is true that inclusion of this modeled process reduces springtime ozone and thus getting the model results closer to observations. However, to really make this statement (and many others like it in the manuscript), other models of sea-ice-related reactive bromine release would have need to have been considered and shown to be of lower skill than the proposed blowing snow SI- sourced bromine model. Without considering if other sea-ice-related processes could work effectively, the authors have not shown that this process is uniquely the one that is responsible. Other models in the literature could release of reactive bromine from snowpack (e.g. Pratt et al. 2013), production of SSA from wind over open water in sea ice leads between ice floes (e.g. Kirpes et al., 2019).*

Answer: In the past decades, more than half a dozen of different mechanisms were proposed as sources of reactive bromine in polar regions, including the snowpack and the open leads mechanisms as pointed by the reviewer. The aim of this study is to focus on one of them, which is the blowing-snow related SSA production scheme addressed in this manuscript and relevant published literatures. Investigating other processes or quantifying their relative contributions is not our goal and out of the research scope of this study. In this study, we demonstrated that blowing snow may be an important source of reactive bromine and models with this scheme implemented can reproduce well observed ozone and BrO. However, our finding does not necessary rule out other processes. To avoid misleading readers, in the revision, we clearly highlight this point in the Summary section: "The success of blowing snow mechanism does not necessarily rule out other possibilities, including the proposed candidates of reactive bromine from snowpack, open leads, frost flowers, sea ice surface, etc." With other words, we do not state that this process is uniquely the one that is responsible for ODE. We have been very careful in our wording on this subject. The present work shows that the some ODEs can be reproduced by models but also that not all events can be captured. We find that the result is a major step forward in our understanding of ODE.

*Question: To be devil's advocate, one could make a model of seasonally varying dry deposition of ozone to snowpack, which could be tuned to get agreement with the observed average monthly ozone data. Should the agreement of this model with average ozone observations then be taken as a sign that this process is the actual physical process that is occurring? The authors neither show that their model is unique nor do they present external validation of aspects of their model.*

Answer: Firstly, a certain level of tuning is unavoidable in modelling, however, adjusting a parameter must be based on either in situ measurement or laboratory data or be constrained by some other reasonable assumption. To follow the reviewer's analogy, if we "make" a model of seasonally varying dry deposition of ozone to snowpack and get the agreement of the model with average ozone observations by tuning dry deposition velocity, then we have shown that such a fictitious process is a candidate to explain our limited observations. Of course, it would then be eliminated by further observations, or by showing via the model that this implies unreasonable constrains on other parameters or processes. Note that in p-

TOMCAT, we decreased (not increased) the original ozone dry deposition velocity on snow/ice (in order to match the UKCA model's average velocity). Thus the simulated spring ozone depletion in the model is not due to the change of ozone dry deposition velocity. Secondly, monthly ozone data comparison is just one of the metrics used in this study to evaluate model's ability; the other one is time-series comparison of hourly ozone and daily tropospheric column BrO from GOME-2. It is clear that monthly data cannot tell the timing and duration of ODEs and BEEs observed in the spring, which hold the key to examine and effectively validate the processes implemented in the models. As shown in new Fig. 7-8 and old Table 3 (new Table 4), simulated 1-hour ozone in p-TOMCAT and the observations are significantly correlated with observed ozone, with  $R=0.68$  at Tiksi, 0.49 at Barrow, 0.60 at Summit, 0.75 at VRS, and 0.22 at Alert. UKCA 3-hour ozone output shows a similar correlation for the same comparison with  $R$  of 0.68 at Tiksi, 0.18 at Barrow, 0.47 at Summit, 0.62 at VRS and 0.41 at Alert (new Fig. 8, see inserted figure in our response to reviewer #2). Modelled  $\text{BrO}_{\text{trop}}$  in the two models also shows significant correlation with the GOME-2 data in most cases (old Fig. 7 and 10, new Fig. 10-11 and 14-15). They strongly indicate that the physical and chemical processes implemented in the models work reasonably well. Apart from the evaluation in this study, we have compared modelled ozone and BrO with various observations in polar regions in many previous work (see Theys et al., 2009; Yang et al., 2010; Zhao et al., 2016, 2017; Legrand et al., 2017). In recent years, we have strictly evaluated the blowing snow related SSA production scheme (Levine et al., 2014; Rachael et al., 2016; 2017; Yang et al., 2019).

*Question: The use of Antarctic snow salinity data scaled by what appear to be a number of tuning parameters without Arctic validation does not give confidence in this SSA production model. Specifically, on page 5, line 37, the authors indicate that they have altered parameters of their model. Why? To what end? Why did they change the snow salinity by 3.5 times Antarctic data? The authors indicate on page 10, line 37 that "We lack snow data on Arctic sea ice to constrain the dataset used in this study". There are papers on snow on sea ice in the Arctic (e.g. Pratt et al. 2013, Krnavek et al., 2012, Xu et al., 2016). How do these observations compare with their scaled salinity.*

Answer: In the revision, we added a new paragraph to discuss about this issue, see below:

“All parameters applied in this study for the Arctic SSA simulation are directly taken from our recent SSA modelling work by Yang et al. (2019), including a 3.5 times Antarctic snow salinity for the Arctic. The Antarctic Weddell Sea snow salinity is a surface snow salinity in distribution (Frey et al., 2019), which is different to the constant value ( $\approx 0.3$  psu, practical salinity unit) used in Legrand et al. (2016), Zhao et al. (2017) and Rhode et al. (2017). The trebled snow salinity assumption is taken from Yang et al. (2008) to reflect the likelihood that Arctic snow is more saline than in the Antarctic due to reduced precipitation. This assumption is partly justified by surface snow  $[\text{Cl}^-]$  concentrations observed at the two poles. For instance, an averaged surface snow (top 1-2 cm)  $[\text{Cl}^-]$  concentration of  $368 \mu\text{M}$  is derived from the Weddell Sea, Antarctic (<https://ramadda.data.bas.ac.uk/repository/entry/show?entryid=853dd176-bc7a-48d4-a6be-33bcc0f17eeb>, Frey et al. (2019)). In the Arctic, Pratt et al. (2013) reported a mean surface  $[\text{Cl}^-]$  concentration of  $1,121 \mu\text{M}$  (top 1 cm) over coastal sea ice near Barrow, Alaska, and Krnavek et al. (2012) reported a much higher surface  $[\text{Cl}^-]$  concentration of  $21,058 \mu\text{M}$  over first-year sea ice and  $63,217 \mu\text{M}$  over multi-year sea ice over a slightly deeper depth of 2~3 cm below the surface. They are about 3, 57 and 172 times of the Weddell Sea surface salinity.” The relative higher salinity in the Arctic is partly related to less precipitation as

already mentioned. For instance, the depth of snowpack on sea ice near Barrow, Alaska is in a range of 10-40 cm (Krnavek et al., 2012), while in the Weddell Sea, the mean snow depth over FYI is 20.9 cm and 50.0 cm over MYI (Frey et al., 2019).

To investigate the effect of snow salinity uncertainty on ozone and  $Br_Y$ , we performed two model experiments: pTOMCAT\_high\_salinity applying a 10 times Weddell Sea salinity and pTOMCAT\_low\_salinity applying a 1 times Weddell Sea salinity (new Table 3 shown below. Note that there are total 8 additional experiments listed in the table). Results are shown in new Fig. 16 (shown below) and new Table 3. Comparing to pTOMCAT\_control run, derived sea-ice sourced  $Br_Y$  (April) in pTOMCAT\_high\_salinity run increases by +94.8%, corresponding to additional ozone loss by -37.5%. Similarly, sea-ice sourced  $Br_Y$  in pTOMCAT\_low\_salinity decreases by -60%, corresponding to ozone gain by +61%. See further discussion in section 5: Discussions (see our reply to reviewer #2).

New Table 3: Model sensitive experiments. The parameters involved in the experiments are listed in the 2<sup>nd</sup> column. The derived sea-ice-sourced  $Br_Y$  and ozone change (relative to pTOMCAT\_OO\_VSLS run) is in the 3<sup>rd</sup> and 5<sup>th</sup> column, respectively. The corresponding percentage (and change) of  $Br_Y$  and ozone are in the 4<sup>th</sup> and 6<sup>th</sup> column, respectively. The ozone difference (also relative to pTOMCAT\_OO\_VSLS run) is in the 5<sup>th</sup> column, with percentage of the control run result (and change) in the 6<sup>th</sup> column. The values are for April, 2007 and representing average of all the six sites.

| Experiments           | Key parameters                                                                                                                                                                        | $\Delta Br_Y$ (pptv) in April<br>(relative to pTOMCAT_OO_VSLS) | % of pTOMCAT_control $\Delta Br_Y$ (and difference) | $\Delta O_3$ (ppbv) in April<br>(relative to pTOMCAT_OO_VSLS) | % of pTOMCAT_control $\Delta O_3$ (and difference) |
|-----------------------|---------------------------------------------------------------------------------------------------------------------------------------------------------------------------------------|----------------------------------------------------------------|-----------------------------------------------------|---------------------------------------------------------------|----------------------------------------------------|
| pTOMCAT_control       | N=20<br>shape parameter $\alpha=3$<br>scale parameter $\beta=37.5$<br>$\mu m$<br>$dm_i/dt=d_i$<br>snow salinity =3.5×<br>Weddell Sea value<br>cut-off radius (dry<br>NaCl)=10 $\mu m$ | 47.2                                                           | 100 (0)                                             | -20.4                                                         | 100 (0)                                            |
| pTOMCAT_spectrum_1    | same as pTOMCAT_control but N=10                                                                                                                                                      | 37.8                                                           | 79.9 (-20.1)                                        | -17.0                                                         | 83.5 (+16.5)                                       |
| pTOMCAT_spectrum_2    | same as pTOMCAT_control but N=1, $\alpha=2$ , $\beta=70$ $\mu m$ and $dm_i/dt=constant$                                                                                               | 27.3                                                           | 57.8 (-42.2)                                        | -12.5                                                         | 61.1 (+38.6)                                       |
| pTOMCAT_low_salinity  | same as pTOMCAT_control but snow salinity =1× Weddell Sea value                                                                                                                       | 18.9                                                           | 40.0 (-60.0)                                        | -8.0                                                          | 39.0 (+61.0)                                       |
| pTOMCAT_high_salinity | same as pTOMCAT_control but snow salinity =10× Weddell Sea value                                                                                                                      | 92.0                                                           | 194.8 (+94.8)                                       | -28.1                                                         | 137.5 (-37.5)                                      |
| pTOMCAT_2×DF          | same as pTOMCAT_control but 2×DF*                                                                                                                                                     | 87.1                                                           | 184.4 (+84.4)                                       | -27.7                                                         | 135.7 (-35.7)                                      |
| pTOMCAT_0.5×DF        | same as pTOMCAT_control but 0.5×DF                                                                                                                                                    | 24.9                                                           | 52.7 (-47.3)                                        | -11.1                                                         | 54.2 (+45.8)                                       |
| pTOMCAT_SSA20 $\mu m$ | same as pTOMCAT_control run but cut-off radius=20 $\mu m$                                                                                                                             | 67.3                                                           | 142.3 (+42.3)                                       | -24.7                                                         | 121.1 (-21.1)                                      |
| pTOMCAT_SSA5 $\mu m$  | same as pTOMCAT_control but cut-off radius=5 $\mu m$                                                                                                                                  | 21.2                                                           | 44.9 (-55.1)                                        | -9.1                                                          | 44.6 (+45.4)                                       |

\*: if the 2\*DF value is > 1.0, then a maximum value of 1.0 is used.

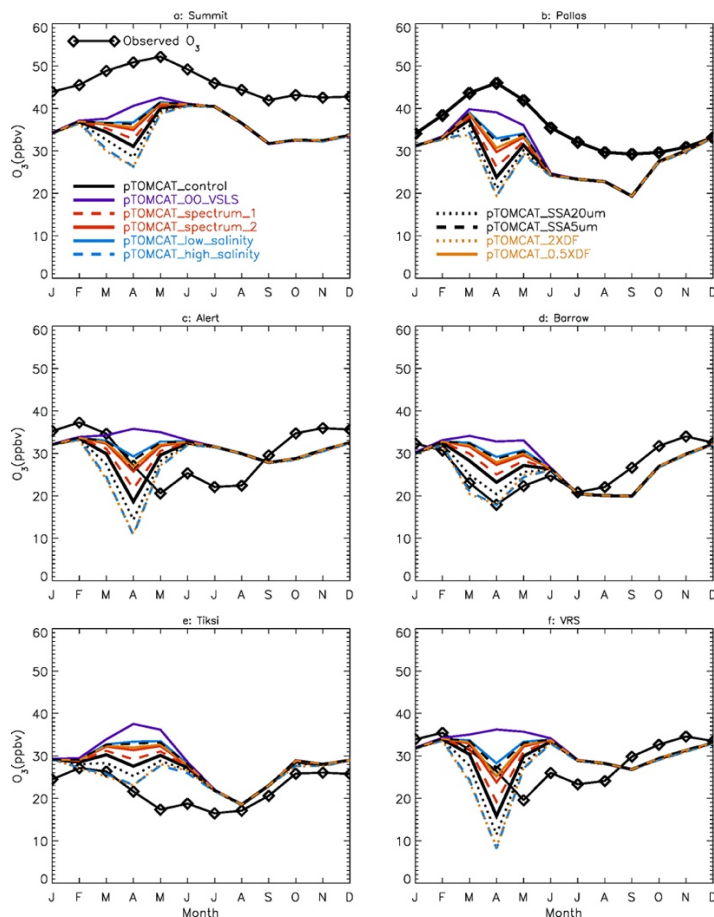

New Fig. 16: Model sensitivity experiments results. Note that ozone observations are climatology and model outputs are only for year 2007.

*Question: It is not clear from this study how reactive bromine is produced from the SSA bromide. The section on this topic is 3.1, and also refers to the supplemental table 1. First, it is not clear what the model is doing. Is the model actually considering heterogeneous chemical reactions that would convert SSA bromide ( $\text{Br}^-$ ) to gas-phase reactive bromine precursors (e.g.  $\text{Br}_2$ )? I expect that the model is not actually considering these reactions, but instead simply multiplying the  $\text{DF} \times \text{SSA}$  to get "lost"  $\text{Br}^-$  from the SSA and making this into  $\text{Br}_2$ . The manuscript should be clear as to what is actually being modeled. If the process is simply taking the bulk  $\text{DF}$  times SSA bromide, then there are a number of physical and chemical problems with this approach. For example, we know that reactive bromine deactivates fairly rapidly (e.g. reaction of  $\text{Br}$  with  $\text{H}_2\text{CO}$  to form  $\text{HBr}$ ), which then partitions to the aerosol particle phase, increasing  $\text{Br}^-$  in the SSA (and thus reducing the  $\text{DF}$ ). This recycling of reactive bromine is needed for persistent (e.g. multi-day)  $\text{BrO}$  events, such as are observed in the large satellite-detected  $\text{BrO}$  events associated with storms. The  $\text{DF}$  is a bulk average for the month, but there were very likely periods where the actual  $\text{DF}$  was larger, only to be reduced by return of bromide following deactivation. A  $\text{DF}$ -based model would also not properly deal with mass transport limitations to aerosol particles that limit gas-surface reactions for supermicron aerosol particles. Thus, there would be a size dependence to aerosol reactivity that is not modeled by a simple  $\text{DF}$ -based approach.*

**Answer:** In section 2.1.2.3 "Treatment of Bromine Emission From Sea Salt" of Yang et al. (2005), we have justified the use of  $\text{DF}$  to describe reactive bromine release from SSA. The

use of bulk depletion factor measured to constrain the total amount of bromide that can be released from SSA has been proven to be a convenient method in dealing with SSA-sourced reactive bromine (see Yang et al., 2005; 2010; Breider et al., 2012; Parrella et al., 2012), even though the actual DF for individual salt particles is different and varying with time and location. Heterogeneous recycling of gas-phase bromine species is included, including the  $\text{HBr} + \text{HOBr} \rightarrow \text{Br}_2$  reactivations, see details in section 2.5 “Treatment of reactivation of inactive bromine species” of Yang et al. (2010). Note that, in our modelling approach, we manually “separate” the above two processes by dealing with net bromide release and the following heterogeneous recycling independently. Thus, the recycling reaction will not allow particles to net gain or lose bromine (see detail on how to deal with this issue in Yang et al., 2010). A size-dependent DF scheme (supplementary Table 1) is applied in our modelling for comparison, see new (and old) Fig. S6. Finally, in order to test our model sensitivity to the DF parameter, in the revision, we performed two experiments by doubling and halving the DF value used in the control run (see new Table 3 above). Comparing to the pTOMCAT\_control run, the sea-ice sourced  $\text{Br}_Y$  (April) in pTOMCAT\_2×DF run increases by +84.4%, corresponding to additional ozone loss by -35.7%. The sea-ice sourced  $\text{Br}_Y$  in pTOMCAT\_0.5XDF reduces by -47.3%, corresponding to ozone increase by +45.8%. Given that the observed DF values in March, April and May are close to 0.5 (Table 1), the doubled DF means a unit DF=1 is used, indicating that all bromide in SSA is emitted to the air as a source of reactive bromine. Thus, this is an extreme experiment representing the maximum effect from blowing snow sourced SSA.

*Question: Lastly, it seems likely that there is a limit to how much reactive bromine can be produced, where the limit is likely related to the availability of radicals. This apparent limit is observed in the fact that few manuscripts report  $\text{BrO}$  mixing ratios more than 30-40 pptv. Presumably any such limit would affect the Antarctic DF data that are the basis for the seasonal DF model being applied in this manuscript. If a DF-based scheme from the Antarctic were used and then the snow salinity (thus SSA mass concentration) is scaled by 3.5x, it would give 3.5x as much production of reactive bromine, but that may then exceed the ability to actually produce reactive bromine precursors from this SSA.*

Answer: As demonstrated previously, surface snow salinity in the Arctic is likely higher than that in the Antarctic. The logistic issue relevant is that under a high snow salinity, the corresponding dry NaCl size formed will be larger than that under a low snow salinity. For a 3.5 times salinity, the dry NaCl radius formed will be larger by ~50%. Since not all SSA formed can release bromide, the application of a cut-off threshold size (a dry NaCl radius of 10  $\mu\text{m}$  in the control run) means SSA in size larger than that threshold size will not be allowed to act as a source of reactive bromine. Thus, bromide release from blowing snow is not linear to snow salinity change. Our model output shows that for a ~3 times increase in snow salinity (pTOMCAT\_high\_salinity vs pTOMCAT\_control), sea-ice sourced  $\text{Br}_Y$  (April) in the Arctic only increases by a factor of ~1 (94.8% in new Table 3). The response of reactive bromine released from SSA varies and depends on the snow salinity. The potentially high snow salinity in the Arctic indeed implies that there will be relatively more SSA formed in the Arctic than in the Antarctic from same amount of sublimated water in blowing snow, and may induce more reactive bromine release.

*Question: The text also says that "... we could not justify this seasonal DF pattern, which demands further systematic measurements in the Arctic. As used in previous modeling studies, a non-seasonal (size dependent) DF scheme for the NH is used for comparison." I think the authors are saying that the process that they are using in this manuscript is not*

*justifiable; if so, why did they describe the seasonal DF mechanism, and it seems they used it for most of the modeling.*

Answer: Our use of the word “justify” is unfortunate; we meant “validate”. Of course, we did mean to say that the DF processes that is not justifiable, just that we lack data to establish its validity. It is a real shame there is no seasonal DF available in the Arctic after so many years of in situ measurements. In the absence of data to confirm (or refute) our model, why derive a seasonal DF pattern for the Arctic based on the available seasonal DF from Antarctica. It is the best we can do; we are simply acknowledging that cannot justify the derived seasonal DF. In addition, in this study, we also perform a comparison to the model run with a fixed DF for all seasons. The major aim of applying a seasonal DF to the Arctic is to investigate how to improve the model-data agreement in Arctic surface ozone reproduction. As we clearly mentioned in the manuscript, this work demonstrates further systematic measurement of this key factor in the Arctic is necessary.

*Question: The abstract (and text) read as if the "result" of attribution of bromine is a result of this study or that model simulations were modified to agree with some aspect of the observations, which doesn't appear to be the case. The model seems to turn on and off processes that are prescribed to get this attribution and no clear "inverse modeling" was carried out to get this reported attribution. This wording should be clearer. In lines 27-29, the implication is made that blowing snow is the source of ODEs, but as described above, they have not uniquely shown that other sea-ice processes (e.g. snowpack chemistry, SSA production from open leads) cannot also be a source of ODEs. Therefore, this wording is misleading. I don't mean to differ with the idea that some ODEs may arise from blowing snow; I think they do, but the wording here discounts other literature-supported ideas for reactive halogen production by not testing them and also by believing that their parameterization is uniquely identified with they process they are trying to model. On lines 34-37, the abstract again tries to uniquely connect the improvement of agreement with observations with the process they intended to model (e.g. blowing snow). I expect that addition of other reactive halogen production models (e.g. snowpack and SSA from open leads) could also result in a model that "works reasonably well", so they have not shown that their improvement requires blowing snow.*

Answer: We derive our conclusion that the blowing snow mechanism is sufficient to reproduce Arctic ODEs, but this is relative to the other two tropospheric sources of bromine (VLS and open ocean sea spray) investigated in this study. Testing other mechanisms and quantifying their relative importance are beyond the scope of this study. In the revision, we added the following sentence in the summary: “The success of blowing snow mechanism does not necessarily rule out other possibilities, including the proposed candidates of reactive bromine from snowpack, open leads, frost flowers and sea ice surface, etc.” In the abstract, we also added one sentence: “Note that this work does not necessarily rule out other possibilities that may act as a source of reactive bromine from sea ice zone.”

*Question: The manuscript's writing is not precise and lacks significant details. The terms "bromine" is used very often, but in some cases they seem to be referring to reactive bromine (e.g. bromine radical species), total inorganic bromine (which is sometimes described as Br<sub>Y</sub>, but often it is not clear), or sometimes seeming to include SSA bromide (Br<sup>-</sup>). The manuscript should chose a language for these species and use them consistently as opposed to the current confusing approach.*

Answer: Points accepted. In the revision, we used more precise terms to avoid confusion.

Question: p2, line 15. VMR is not defined.

Answer: Definition of VMR is given in its first place.

*Question: P2, line 26. The inclusion of "stratospheric BrO intrusions" is misleading here. Salawitch et al. 2010 discusses BrO total column enhancement due to stratospheric BrO intrusions, while this section is talking about release of reactive halogens in the lower troposphere. This should be clarified.*

Answer: In the revision, we clearly mentioned that “In addition, stratospheric BrO intrusions in association with downward transport of air masses from lower stratosphere could affect polar free tropospheric BrO (Salawitch et al., 2010).”

*Question: p2, line 34. "cruise data" – clarify. Note that this is Antarctic data.*

Answer: We added “, Antarctic” after “the Weddell Sea”

*Question: p2, line 43. The text says "bromine depletion", when I think they mean "bromide depletion". This is one of many instances of inaccurate use of bromine-related terms. I am not pointing them all out, but they happen dozens of times throughout the text. Please chose terms, define them early and use them accurately.*

Answer: We have gone through the whole text and corrected the misusing of the terms.

*Question: p3, line 15. Specify "Pallas, Finland"*

Answer: Done.

*Question: p3, line 24. What is an "integration"? Please explain.*

Answer: “integration” means “simulation”, a term widely used in modelling related studies.

*Question: p3, line 26. Is "validate" the right term here? Neither SSA production nor reactive bromine release is actually validated in this study – the effect of these modeled processes on ozone depletion and BrO are explored.*

Answer: We re-phrased this sentence: “to validate the effect of these modelled processes on ozone depletion and BrO enhancement”.

*Question: p4, line 7. The sentence "During the period..." is quite hard to read. I think "All" on line 8 maybe should not be capitalized?*

Answer: In the revision, we rewrote this sentence, it reads now: “During the period of interest here, all ozonesondes used were electrochemical concentration cells (ECC) (Komhyr, 1969), manufactured by Environmental Science (EN-SCI) Corp. All sondes used the conventional neutral-buffered 1% potassium iodide sensing solution.”

*Question: p4, line 29. Cut "that" at the end of the line. Next line says "surface spectral reflectance of 0.9" and is confusing. I think a non-spectral (e.g. not a function of wavelength) albedo of 0.9 is used in the spectral band of the retrieval (a band in the UV). If a spectrally varying albedo is used, please give more details describing this function.*

Answer: Point taken. In the revision, we removed the misleading word “spectral” in the sentence.

*Question: p5, line 4. "...to the surface." is not well defined here. Earlier, the manuscript indicates that for VCD trop correction, BrO is assumed to be well mixed and below 400m. Thus this station (610m AGL) is above the BrO layer and looks up, so it has little sensitivity below it. Please clarify what is meant by "surface" in this context.*

Answer: In the revision, we have the new sentence “The retrievals were performed on a 0-4 km altitude grid with 0.2 km resolution. Due to the altitude of the instrument (610 m) and the lack of low or negative elevation angles, the retrieved profiles are only sensitive to well-mixed BrO in a deep boundary layer, and to lofted BrO event.”

*Question: p5, line 15. 10 hPa is a pressure not an altitude, please be clearer.*

Answer: We added “(~31km)” after “10 hpa” for an easy understanding.

*Question: p5, line 22. Has this model actually been validated in terms of vertical transport under stable Arctic conditions? I went to check these citations and found that "Ruti et al. 2011" is not in the citations, so I could not check. In another place, the text seems to indicate that the validation in Russo et al. 2011 is for tropical conditions. On page 6, it says "A detailed comparison of model characteristics in vertical mixing and transport of tropical boundary layer tracers was performed by Russo et al. (2011)". Please indicate if the model has been validated for the Arctic.*

Answer: Sorry, "Ruti et al. 2011" should be “Hoyle et al, 2011”. They are both for tropical conditions. There is no such kind of modelling validation in the Arctic.

*Question: p5, line 26. Ozone deposition has been studied by Helmig, Bocquet, and others working in that group. Please include this work.*

Answer: We cited the review article by Helmig et al. (2007).

*Question: p6, line 38. How is "a full distribution of surface snow salinity" used in the model? Please clarify. Generally, details on how this model works are lacking.*

Answer: To avoid confusion, we changed ‘a full distribution’ to “a probability of surface snow salinity” as used in Fig. 16b of Frey et al. (2019).

*Question: p7, lines 1-5, also bottom of prior page. Why were these changes made? It appears that the model was being tuned in some way, but to what end? I believe that the Huang and Jaegle work has tuned the model in multiple ways so as to agree with various truth metrics (e.g. aerosol extinction from satellite, SSA observations, etc.). Please put your modifications into the context of other tunings and give a description of why this was done (e.g. what truth metric were you trying to match when you chose say  $N=20$ ?).*



Answer: As clearly mentioned previously that all the parameters applied in this study for SSA production are directly taken from recent SSA modelling work by Yang et al. (2019); thus there is no further tuning in this study. The different parameters mentioned in the manuscript are for track record only. The reason why we chose this set of parameter (namely the SI\_Classic\_BX20 run in Yang et al. (2019) is that it is one of the parameter sets that best matched the Weddell Sea SSA in size range of 0.4 – 10  $\mu\text{m}$ . This set also gave the highest SSA mass loading in Polar Regions (Yang et al., 2019). We have clearly mentioned this issue in the revision. To investigate model sensitivity to the SSA spectrum, we performed two additional model experiments: pTOMCAT\_spectrum\_1 and pTOMCAT\_spectrum\_2 (new Table 3). The former one applies same parameter set but a small  $N=10$ , the later one corresponds to the SI\_Base run in Yang et al., (2019), another “best” one marches the cruise data. As shown in new Table 3 that the sea-ice sourced  $\text{Br}_Y$  in these two runs reduces by -20.1% and  $\sim 42.2\%$ , respectively, corresponding to ozone increase by 16.5% and 38.6%.

*Question: p7 line 15. It is discussed that this approach “may introduce bias”. Please describe the model here, possibly pointing to a future “discussion” of this point.*

Answer: (I think you meant p6 line 15). In the revision, we added one sentence “Thus, we may overestimate the open-ocean-sourced SSA effect in polar regions, as the alkaline buffering effect is not considered.”

*Question: p6, line 21. The language seems to often be in jargon of the field. What is a “dynamical core”?*

Answer: “dynamical core” refers to the meteorology field used in the UKCA model and is generated by the “core” of the Unified Model. UKCA is just a chemistry-aerosol mode of the UK Earth System Model.

*Question: p6, line 25. What does “but has since developed differently and now...” mean?*

Answer: To avoid confusion, we simply deleted “but has since developed differently and now”.

*Question: p6, line 28. I think it points to lack of detail on what the models are doing, but I don't understand what “tagged and tracked for online calculation of heterogenous reaction rates.” Means. Does the UKCA model not consider heterogenous reactions?*

Answer: UKCA does contain heterogeneous reactions. UKCA used monthly climatology aerosol data for the heterogeneous rate calculation, and p-TOMCAT used online calculated SSA and cloud droplets for the heterogeneous reaction rate calculation. There are 21 size bins for SSA in generated from open ocean and sea ice, thus we have to “tag” them in order to track and record their concentrations in all grid cell at every time step.

*Question: p6, line 36. Is there no heterogenous reaction of  $\text{HOBr}$  with aerosol bromide? If that process is considered, is the  $\text{Br}_2$  produced by it put in the grid cell (vertically) where it happened or is it placed at the surface?*

Answer: Both models contain same heterogeneous reaction scheme as described in Yang et al. (2010), including the  $\text{HOBr} + \text{HBr} \rightarrow \text{Br}_2$ . This reaction happens in all grid cells where there are SSA and/or particles. Since we separate bromine emission from the heterogeneous

reaction on aerosols, thus emitted Br<sub>2</sub> from freshly generated SSA is only placed in the surface layer. Namely, once we used DF to describe the reactive bromine release from SSA, these SSA will no longer allow net bromide release (or net gain of bromine) and only serve as a medium for heterogeneous reaction (see our explanation above).

*Question: p7, line 10. "model responses"? Maybe "model results"? This confusion continues onto line 11, where I think the species compared are bromine mixing ratio (or partial column) and ozone mixing ratio.*

Answer: OK, points taken.

*Question: p7, line 12. Maybe "model configuration" instead of "set-ups"?*

Answer: Point taken.

*Question: p7, line 16. Many acronyms in this line. Can the point be made with words?*

Answer: We deleted the sentence in response to reviewer #2's comment.

*Question: p7, line 27. I think the "minimum monthly-average VMRs" are being discussed. These are not the "minimum VMRs", which are clearly lower than the monthly average.*

Answer: We removed "minimum"

*Question: p7, line 32. I would say "further south".*

Answer: Point accepted.

*Question: p7, line 25. Again the use of imprecise language on bromine species is evident. I don't think they mean "Br" atoms on this line.*

Answer: (actually it is p7 line 35) We changed 'Br' to 'reactive bromine'

*Question: p7, line 37. I think they mean to say "OO-sourced bromine does not alter..."*

Answer: point accepted.

*Question: p7, line 40. "maximum ozone loss" is confusing in this context. Maybe the peak of the annual ozone loss amount is meant?*

Answer: Point accepted.

*Question: p8, line 5. This finally defines BrY. Please move the definition much earlier and clarify your bromine terms. I think the formula should say 2 times Br<sub>2</sub>. The X is confusing.*

Answer: Point accepted. We moved forward the definition of BrY.

*Question: p8, line 29. 0.5 ppt of BrY is discussed here, which makes me wonder if BrY is the surface BrY, or includes BrY at higher altitudes? Please clarify what is being measured and how VSLs bromocarbons contribute to it.*

Answer: As shown in new Fig.S7 (below), VLSL contribution to Arctic tropospheric Br<sub>Y</sub> increases from near surface layer ~0.5 pptv (in April and July) to ~2 pptv at ~200 hpa. In April, it only accounts for 2~4% of the total Br<sub>Y</sub> in the surface layer and ~40% at 200 hpa. In July, it accounts for 15~20% Br<sub>Y</sub> in the surface layer and >60% at 300-400 hpa.

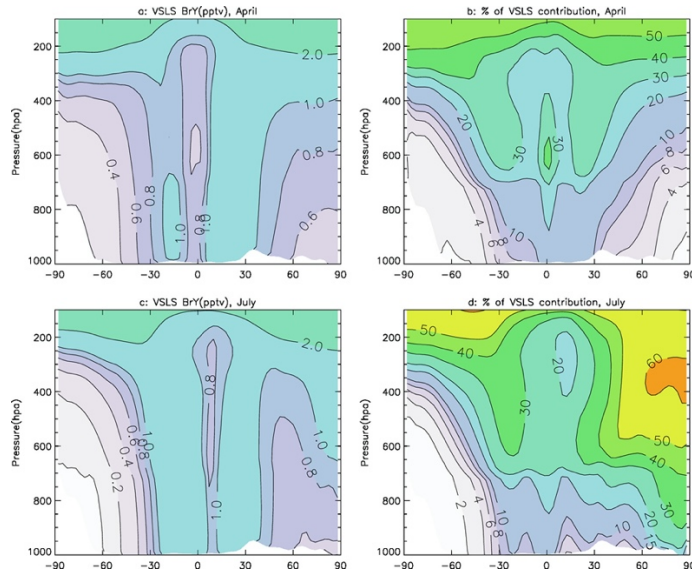

New figure S7: Zonal mean of VLSL Br<sub>Y</sub> (pptv) and percentage contribution to total Br<sub>Y</sub> in April (a, b) and July (c, d). Values are from a 3-years p-TOMCAT integration.

*Question: p9, top. The manuscript does a good job describing the distributions of ozone observed and as calculated by the model, but the discussion of this point is lacking. The observed ozone distributions are sometimes bimodal, and are generally much flatter, while the modeled distributions are mono-modal and simply shifted to lower values. However, the general metric used for skill of the model is the monthly mean (e.g. Fig. 2). Even if the mean were correct, a differing distribution function indicates that the modeling is having problems reproducing the processes.*

Answer: The reviewer's statement that "the general metric used for skill of the model is the monthly mean" is not correct. Monthly mean is just one of the comparison metrics used in this study. Another important metric for skill of the model is the time series comparison for hourly surface ozone and daily tropospheric column BrO, in particular the statistical analysis between model output and observations as shown in new Fig. 7-10 and 14-15 (also see our answer to your similar question in page 2).

*Question: p9, line 27. The statement "In general, boundary layer ozone is influenced by column BrO...." I am not sure I understand if this is a result of the current study or an idea from the literature that is being cited (without reference) as a partial explanation of this study. Please clarify this section of the text.*

Answer: This conclusion is a result of this study, and mainly taken from the model output shown in new Table 4 (old 3). For example, observed ozone at Barrow and Alert are significantly correlated with modelled tropospheric column BrO but surface BrO. This is because ozone has much longer lifetime than BrO, due to vertical mixing and/or air ventilation at the top of the boundary layer, ozone and reactive bromine in the free troposphere may influence surface ozone within the boundary layer.

*Question: p10, line 33. Please add "modeled" to make the text read "that affect modeled bromine emissions".*

Answer: We have re-written this section.

*Question: p10, line 37. Please consider Arctic snow data as discussed above.*

Answer: See our previous response to your similar question raised before.

*Question: p11, lines 1-4. This sentence is long and not clear. I'm not sure what is being discussed with respect to a "cut-off size". If there were actual heterogeneous processes being modeled, then the size distribution would matter a lot. Submicron aerosol particles tend to have little mass transport limitations for gas-surface reactions, but super-micron particles suffer transport limitations, so the same mass loading of SSA would have drastically different heterogeneous reactivity if it were all sub-micron or all super-micron. Please clarify and discuss.*

Answer: The 'cut-off size' was introduced to reflect the observations (see Sander et al., 2003) that large giant SSAs have relatively lower bromide depletion strength (due to relatively shorter lifetime) than small SSAs. In the control run, we used a dry NaCl radius of 10  $\mu\text{m}$  as the threshold size, which means a large SSA particle with dry NaCl radius larger than 10  $\mu\text{m}$  will not be considered as a source of reactive bromide. On the other hand, the choice of the cut-off threshold size also affects the emission flux of reactive bromine from SSA. In the revision, we performed two extra experiments: pTOMCAT\_SSA20, in which a large threshold radius of 20  $\mu\text{m}$  is used, and pTOMCAT\_SSA5, in which a small threshold radius of 5  $\mu\text{m}$  is used. See results shown in in new Fig. 16 and new Table 3, more in the discussion section.

*Question: p11, lines 10-14. In the presence of heterogenous reactions that release Br- from aerosol particles and also formation of HBr that then sticks back to particles, the DF will be highly variable. Snowpack bromide observations (e.g. Krnavek et al., 2012) indicate that some snow is enhanced and some is depleted, and that varies in time. Thus, the use of a monthly DF seems unrealistic in the presence of gas-surface exchange of bromine species.*

Answer: As mentioned previously that we applied a non-process based approach to deal with the bromide release from SSA, namely a bulk rather than a single-particle based approach. Thus we do not resolve every single SSA but focus on their average (Yang et al., 2005). In order to investigate the uncertainty this method induces, we performed two model experiments: pTOMCAT\_2XDF used a doubled DF, and pTOMCAT\_0.5XDF used a halved DF (new Table 3). Given that the original DF values in March, April and May are close to 0.5 (Table 1), the doubling scenario means DF is close to 1, representing an extreme case that all bromide in sea-ice sourced SSA will release to the air to act as a source of reactive bromine. Results are shown in new Fig. 16 and Table 3, and discussed in the discussion section.

*Question: p11, lines 22-32. Again, other models of sea-ice-related production of reactive bromine (e.g. snowpack, SSA from open water leads) may be able to also explain the springtime ODEs and tropospheric BrO – this manuscript just did not test them. Thus, I agree that there is some sea-ice-related mechanism, but not necessarily only the blowing snow mechanism. The manuscript disregards other potential processes and thus may be misrepresenting the actual underlying physical process (or more likely multiple processes).*

Answer: Point taken. In the revision, we clearly mentioned that this study does not rule out other possibilities.
